# Supplementary material
Source: PubMed Central journal article supplement (PMC9534047)
Supplement: mmc1.pdf [file mmc1.pdf]

## **Supplemental Information**

### **Cross-Neutralizing and Protective Human**

### **Antibody Specificities to Poxvirus Infections**

**Iuliia Gilchuk, Pavlo Gilchuk, Gopal Sapparapu, Rebecca Lampley, Vidisha Singh, Nurgun Kose, David L. Blum, Laura J. Hughes, Panayampalli S. Satheshkumar, Michael B. Townsend, Ashley V. Kondas, Zachary Reed, Zachary Weiner, Victoria A. Olson, Erika Hammarlund, Hans-Peter Raue, Mark K. Slifka, James C. Slaughter, Barney S. Graham, Kathryn M. Edwards, Roselyn J. Eisenberg, Gary H. Cohen, Sebastian Joyce, and James E. Crowe, Jr.**

**SUPPLEMENTAL TABLES**

**Table S1. Generation of Human B Cell Hybridomas From PBMCs of Vaccinia-Immunized Subjects or From a Subject Who Had a History of Naturally-Acquired Monkeypox Infection, Related to Figure 1**

| Subject        | Vaccine or infection                   | Time post-exposure when blood was taken | Serum neutralizing reciprocal titer <sup>a</sup> , (fold dilution) | Number of individual hybridomas generated from sample |
|----------------|----------------------------------------|-----------------------------------------|--------------------------------------------------------------------|-------------------------------------------------------|
| MVA 1          | Modified Vaccinia Ankara (MVA) vaccine | Day 14 after booster vaccination        | ND                                                                 | 16                                                    |
| MVA 3          |                                        |                                         | ND                                                                 | 1                                                     |
| MVA 4          |                                        |                                         | ND                                                                 | 3                                                     |
| MVA 12         |                                        |                                         | ND                                                                 | 2                                                     |
| MVA 19         |                                        |                                         | ND                                                                 | 1                                                     |
| MVA 21         |                                        |                                         | ND                                                                 | 3                                                     |
| VRC-201-003-09 | Dryvax vaccine                         | 9 months                                | 1,000                                                              | 1                                                     |
| VRC-201-040-05 |                                        | 5 months                                | 693                                                                | 9                                                     |
| VRC-201-044-06 |                                        | 6 months                                | 638                                                                | 1                                                     |
| VRC-201-020-08 |                                        | 8 months                                | 610                                                                | 6                                                     |
| 18             | Acam2000 vaccine                       | 21 days                                 | 10                                                                 | 1                                                     |
| MSK452         | Monkeypox virus infection              | 1 year                                  | 108                                                                | 45                                                    |

<sup>a</sup>Based on plaque reduction neutralizing test performed using VACV strain WR.

ND indicates not determined

**Table S2. Sequence Diversity of Antibody Variable Genes Encoding Poxvirus-Specific MAbs, Related to Figure 1**

| Antigen | Donor          | mAb      | Heavy chain variable gene sequence |                                                                    |                     |                      |                            |                  | Light chain variable sequence |                                                                    |                     |                        |                  |
|---------|----------------|----------|------------------------------------|--------------------------------------------------------------------|---------------------|----------------------|----------------------------|------------------|-------------------------------|--------------------------------------------------------------------|---------------------|------------------------|------------------|
|         |                |          | V <sub>H</sub> gene                | V <sub>H</sub> region nucleotide % homology to V <sub>H</sub> gene | D <sub>H</sub> gene | J <sub>H</sub> gene  | HCDR3 amino acids (aa)     | CDR3 length (aa) | V <sub>L</sub> gene           | V <sub>L</sub> region nucleotide % homology to V <sub>L</sub> gene | J <sub>L</sub> gene | LCDR3 amino acids (aa) | CDR3 length (aa) |
| D8      | MVA 1          | VACV-8   | 4-34                               | 92                                                                 | 1-7                 | 6                    | ARVMTGITNYYYYYGM DV        | 18               | 1-9                           | 91                                                                 | 2                   | QHLNSYPRGYT            | 11               |
|         |                | VACV-56  | 4-34                               | 90                                                                 | 3-10                | 6                    | ARATQGSQGYKLFYFSGMDV       | 21               | 1-5                           | 99                                                                 | 2                   | QQYNSYPYT              | 9                |
|         |                | VACV-66  | 4-39                               | 87                                                                 | 3-10                | 5                    | ARHRRVLLWFGFQL             | 15               | 1-40                          | 98                                                                 | 2                   | QSYDSSLSGAL            | 11               |
|         |                | VACV-77  | 4-59                               | 88                                                                 | 6-6                 | 4                    | AREDRGSPDY                 | 10               | 1-51                          | 98                                                                 | 3                   | GTWDL SLSAGV           | 11               |
|         |                | VACV-116 | 1-8                                | 96                                                                 | 3-22                | 4                    | ARTPFDSGYYY                | 12               | 2-28 or 2D-28                 | 99                                                                 | 1 or 3              | MQALQTPGA              | 9                |
|         |                | VACV-117 | 1-8                                | 93                                                                 | 3-22                | 4                    | ARTPFDDIGYYY               | 12               | 2-28 or 2D-28                 | 81.5                                                               | 1 or 3              | Identical to VACV-116  | 9                |
|         |                | VACV-128 | 1- <sup>*</sup> 01                 | 83                                                                 | 3-9                 | 4                    | ARELTGYLNY                 | 10               | 1-27                          | 78                                                                 | 1 or 3              | QKYNSAPHT              | 9                |
|         |                | VACV-136 | 2-26                               | 95                                                                 | 1-1                 | 4                    | ARMRGEYNSYYFDS             | 14               | 3-25                          | 98                                                                 | 2 or 3              | QSADSSGTSVV            | 11               |
|         | VACV-138       | 1-46     | 75                                 | 2-21                                                               | 4                   | ASRDIVVV TATRSPFDY   | 17                         | 3-20             | 99                            | 2                                                                  | QQYGSPPYT           | 10                     |                  |
|         | MVA 3          | VACV-168 | 4-59                               | 96                                                                 | 3-22                | 4                    | ARLRGNYASSGYYNFYD          | 18               | 1-51                          | 99                                                                 | 1                   | GTWDSLSAYV             | 11               |
|         | MVA 4          | VACV-159 | 4-39                               | 88                                                                 | 3-10                | 4                    | ARHLRVLLWFGELLE            | 15               | 1-40                          | 98                                                                 | 1                   | QSHDSSLSGYV            | 11               |
|         | MVA 19         | VACV-199 | 1-2                                | 92                                                                 | 6-13                | 5                    | ARVPPDSSSWK                | 11               | 2-28 or 2D-28                 | 99                                                                 | ND                  | ND                     | ND               |
|         | MVA 21         | VACV-228 | 3-21                               | 85                                                                 | 6-13                | 4                    | ASRPGIAPAGPQAEQY           | 16               | 3-20                          | 83                                                                 | ND                  | ND                     | ND               |
|         |                | VACV-230 | 1-24                               | 92                                                                 | 3-10                | 4                    | ARESWLRGFDY                | 11               | 3-20                          | 74                                                                 | 1                   | QQYGSPPYT              | 9                |
|         |                | VACV-249 | 4-61                               | 86                                                                 | 6-19                | 2                    | ARDGWYGWYLDL               | 12               | 3-15                          | 99                                                                 | 4                   | QQYNNWPPT              | 9                |
|         | VRC-201-040-05 | VACV-304 | 3-7                                | 87                                                                 | 6-19                | 4                    | ATLNLELAVDAISEALK          | 17               | 3-25                          | 82                                                                 | 2                   | QSVDNSGTYYEV           | 11               |
|         | MSK452         | MPXV-27  | 4-34                               | 93                                                                 | 5-12                | 6                    | ARVLSGWLPPFNYYMDV          | 19               | 1-17                          | 95                                                                 | 1 or 4              | LQHNSSPPT              | 9                |
|         |                | MPXV-30  | 1-69                               | 82                                                                 | 4-23                | 3                    | ATGGNIRVHDFDI              | 13               | 2-30                          | 98                                                                 | 1                   | MQGTHWPPRWT            | 11               |
|         |                | MPXV-40  | 4-34                               | 82                                                                 | 2-21                | 6                    | ARISSGWIFPRYHYLDV          | 19               | 3-13                          | 85                                                                 | ND                  | ND                     | ND               |
|         |                | MPXV-61  | 1-69                               | 92                                                                 | 3-10                | 5                    | ASSLPSTYYFGSGNYWGNWLDP     | 23               | 1-51                          | 94                                                                 | 2 or 3              | GTWDSLSSEVV            | 11               |
| MPXV-96 |                | 4-34     | 86                                 | 5-21                                                               | 4                   | ARGLRGNVCFD          | 12                         | 3-15             | 98                            | 2                                                                  | QQYNNWPRT           | 9                      |                  |
| B5      | MVA 1          | VACV-1   | 3-48                               | 86                                                                 | 2-15                | 6                    | ARRSVGCSGGNCAAYYGM DV      | 21               | 2-28 or 2D-28                 | 99                                                                 | 5                   | MQALQTPIT              | 9                |
|         |                | VACV-59  | 3-11                               | 86                                                                 | 3-10                | 6                    | ARDGDGSGSYTPPYYYGLDV       | 21               | 1-39 or 1D-39                 | 98                                                                 | 4                   | QQSYSTPPLT             | 10               |
|         | MVA 4          | VACV-151 | 3-21                               | 98                                                                 | ND                  | ND                   | ND                         | 3-20             | 99                            | 2                                                                  | QQYGSPPYT           | 9                      |                  |
|         | MVA 12         | VACV-282 | 3-21                               | 84                                                                 | 3-10                | 6                    | ARDRPRS RPN S GSYFWYYGM DV | 23               | 3-21                          | 98                                                                 | ND                  | ND                     | ND               |
|         |                | VACV-283 | 1-69                               | 84                                                                 | 3-16                | 6                    | ARRGGEGAAHGMDV             | 14               | 2-28 or 2D-28                 | 99                                                                 | 5                   | LQALQTLPT              | 10               |
|         | MSK452         | MPXV-2   | 1-3                                | 87                                                                 | 3-9                 | 5                    | ARPRASLLRYFDWLF EQ         | 17               | 3-20                          | 85                                                                 | 2                   | QQYGNV PYS             | 10               |
|         |                | MPXV-12  | 4-34                               | 85                                                                 | 3-10                | 6                    | ARDVYGS GTY YWFDP          | 15               | 1-39 or 1D-39                 | 96                                                                 | 2                   | QQSYTTPYT              | 9                |
|         |                | MPXV-13  | 4-4                                | 89                                                                 | 6-19                | 4                    | ARSGRYSSVTPFDY             | 14               | 3-11                          | 85                                                                 | 3                   | QQRSHWPA               | 8                |
|         |                | MPXV-25  | 3-33                               | 84                                                                 | 2-15                | 3                    | ARELGYCSGGTCY SMGAFDI      | 20               | 2-23                          | 98.5                                                               | 3                   | CSYVGSSTSV             | 10               |
|         |                | MPXV-38  | 3-15                               | 95                                                                 | ND                  | ND                   | ND                         | ND               | 3-20                          | 95                                                                 | ND                  | ND                     | ND               |
|         |                | MPXV-43  | 1-3                                | 93                                                                 | 3-3                 | 1                    | ARDFEDFDSWTGYYSWLH         | 18               | 3-20                          | 97                                                                 | 5                   | QQYDSSPSIT             | 10               |
|         |                | MPXV-66  | 4-34                               | 94                                                                 | 6-13                | 4                    | ARTARTVRYFEN               | 12               | 4-1                           | 90                                                                 | 1                   | QQYYSTPWT              | 9                |
| MPXV-70 |                | 3-11     | 85                                 | 2-2                                                                | 3                   | ARGGGYCGGTTCSMGHAFDI | 20                         | 3-20             | 93                            | 1 or 2                                                             | QQYGSPPY            | 8                      |                  |
| MPXV-92 | 4-4            | 88       | 2-21                               | 1                                                                  | ARNFYPGYLQY         | 11                   | ND                         | ND               | ND                            | ND                                                                 | ND                  |                        |                  |
| A33     | MVA 1          | VACV-5   | 3-30                               | 91                                                                 | 2-21                | 4                    | AKEACGGDCYSNYFHY           | 16               | ND                            | ND                                                                 | ND                  | ND                     | ND               |
|         |                | VACV-22  | 3-33                               | 85                                                                 | 2-21                | 1                    | ARVPCGGDCYSGYLQH           | 16               | 3-15                          | 98                                                                 | 4                   | QHYNWPPLLT             | 11               |
|         |                | VACV-80  | 3-74                               | 84                                                                 | 6-13                | 4                    | ARVGAVRIAAAAPDY            | 15               | 4-1                           | 99                                                                 | 1                   | QQYYSTPWT              | 9                |
|         | MSK452         | MPXV-39  | 4-34                               | 81                                                                 | 1-7                 | 5                    | ASGNYR                     | 6                | 2-30                          | 97                                                                 | 2                   | MQGTHWPRT              | 9                |
|         |                | MPXV-51  | 4-39                               | 87                                                                 | 3-16                | 5                    | GRLTPRN LFRGTLVRWVDP       | 19               | 3-20                          | 96                                                                 | 4                   | QQYAGSLT               | 8                |
|         |                | MPXV-56  | 6-1                                | 96                                                                 | 6-13                | 5                    | ND                         | ND               | 4-1                           | 97                                                                 | 4                   | QQYYSSPLT              | 9                |
|         |                | MPXV-91  | 3-30                               | 93                                                                 | ND                  | ND                   | ND                         | ND               | 1-47                          | 98                                                                 | 3                   | AAWDDSLSGKV            | 11               |
| MPXV-99 | 3-30           | 84       | 3-10                               | 4                                                                  | ARADRGYFGH          | 10                   | ND                         | ND               | ND                            | ND                                                                 | ND                  |                        |                  |
| H3      | VRC-201-020-08 | VACV-314 | 4-59                               | 78                                                                 | 3-10                | 4                    | ARLAGRKP DADS              | 12               | 7-43                          | 98                                                                 | 5                   | LLYYGGVVV              | 9                |
|         |                | VACV-315 | 3-23                               | 81                                                                 | 4-11                | 4                    | AKGRARVNNI RYFDH           | 16               | 2-14                          | 95                                                                 | 3                   | NSYTTSPWV              | 10               |
|         | MSK452         | MPXV-1   | 3-23                               | 87                                                                 | 3-22                | 2                    | ARDTYYYSRIWYFGL            | 16               | ND                            | ND                                                                 | ND                  | ND                     | ND               |
|         |                | MPXV-29  | 1-69                               | 87                                                                 | 3-10                | 5                    | ARAVITMVRGDIPLGWFD P       | 19               | 3-20                          | 98                                                                 | 1                   | QQYGSPPPT              | 9                |
|         |                | MPXV-72  | 2-5                                | 88                                                                 | 6-19                | 3                    | AHRSVAGRDLAFDI             | 15               | 2-14                          | 88                                                                 | 3                   | QLHIPSGLTWV            | 11               |
|         |                | MPXV-76  | 3-15                               | 90                                                                 | 3-10                | 4                    | TTSFTPRRIFAY               | 13               | 3-11                          | 90                                                                 | 3                   | QLRNSWPPT              | 9                |
| MPXV-79 | 1-18           | 84       | 7-27                               | 3                                                                  | ARDPKLGRKGS AFDI    | 15                   | 3-11                       | 94               | 2                             | LQRS DLYT                                                          | 8                   |                        |                  |
| MPXV-85 | 3-23           | 84       | 1-26                               | 3                                                                  | AKDRVVGATYPRGV FDI  | 17                   | ND                         | ND               | ND                            | ND                                                                 | ND                  |                        |                  |
| L1      | MVA 1          | VACV-33  | 4-39                               | 83                                                                 | 6-6                 | 4                    | ARQSSSTGGFHY               | 12               | 1-40                          | 97                                                                 | 2                   | QSYDSSLSGREV           | 12               |
|         |                | VACV-34  | 3-9                                | 85                                                                 | 3-22                | 4                    | AKETEKYYYDSSGYDY           | 16               | 3-20                          | 99                                                                 | 2                   | QQYGSRGT               | 8                |
|         | MSK452         | MPXV-26  | 3-53                               | 92                                                                 | 5-12                | 4                    | AKGGGLGLDY                 | 10               | 2-8                           | 70                                                                 | 2 or 3              | SSYAGTETVA             | 10               |
|         |                | MPXV-74  | 1-69                               | 80                                                                 | 5-24                | 4                    | GVYNAN                     | 6                | 2-28 or 2D-28                 | 95                                                                 | ND                  | LQARHTP                | 7                |
|         |                | MPXV-83  | 3-30                               | 92                                                                 | 2-8                 | 3                    | ND                         | ND               | 1-33 or 1D-33                 | 94                                                                 | 2 or 3              | QQFHSLPPT              | 9                |
| MPXV-87 | 1-18           | 83       | 6-19                               | 6                                                                  | ARSSSGPRYYYGM DV    | 16                   | 1-40                       | 93               | 3                             | QSYDSSLSGWV                                                        | 11                  |                        |                  |

|         |                |          |      |    |              |    |                                 |    |               |                      |        |               |    |
|---------|----------------|----------|------|----|--------------|----|---------------------------------|----|---------------|----------------------|--------|---------------|----|
| A27     | MVA 4          | VACV-154 | 3-23 | 85 | 3-22         | 3  | AKIRLDSSGYSGAFDI                | 16 | 3-25          | 99                   | 2 or 3 | QSADSSGTYPPVV | 12 |
|         | VRC-201-040-05 | VACV-300 | 1-69 | 93 | 6-19         | 5  | ARASEQWLASINWFDP                | 16 | 2-23          | 90                   | 3      | CSYAGSSFLV    | 10 |
|         |                | VACV-301 | 3-23 | 79 | 3-16         | 4  | AKWGRFESGAF                     | 11 | 3-25          | 96                   | 1      | QSADNSGTYEV   | 11 |
|         |                | VACV-302 | 4-39 | 88 | 6-13         | 4  | ARQSKAAAAGSIDY                  | 14 | 2-28 or 2D-28 | 99                   | 5      | MQALQTPIT     | 9  |
|         |                | VACV-303 | 3-23 | 87 | 5-12         | 4  | ATSLIWQLQSDY                    | 12 | 1-39 or 1D-39 | 98                   | 1      | QQSYSTPQT     | 9  |
| I1      | MSK452         | MPXV-10  | 5-51 | 88 | 4-17         | 4  | ARAMTIVTPFDY                    | 12 | 3-1           | 86                   | 2 or 3 | QAWDSATVV     | 9  |
|         |                | MPXV-31  | 5-51 | 81 | 1-26         | 4  | ARPRQVGANRGYFDY                 | 16 | 4-1           | 94                   | 4      | QQYYSPPAELS   | 11 |
|         |                | MPXV-53  | 3-33 | 91 | 6-19         | 4  | ND                              | ND | 3-21          | 95                   | ND     | ND            | ND |
|         |                | MPXV-71  | 3-64 | 81 | 3-10         | 4  | VRCLLRGLISPFDY                  | 14 | 1-36          | 54                   | 3      | STWDYLSARV    | 11 |
|         |                | MPXV-97  | 3-30 | 89 | 6-25         | 2  | ARLSLEAAWYFDL                   | 13 | 1-40          | 93                   | 1      | QSYDNSLNGPWV  | 12 |
| A25     | VRC-201-040-05 | VACV-309 | 3-23 | 86 | 1-1          | 6  | AKDNNYYYYGMDV                   | 13 | 1-6           | 100                  | 1      | LQYNYPRM      | 9  |
|         | VRC-201-044-06 | VACV-312 | 3-33 | 88 | 4-11         | 3  | ARVARDYSNIFDAFDI                | 16 | 1-39 or 1D-39 | 98                   | 5      | QQSYSTPIT     | 9  |
|         | VRC-201-020-08 | VACV-313 | 4-39 | 88 | 6-13         | 4  | VRIAVAAAGTDY                    | 12 | 3-15          | 97                   | 2      | QQYNNWPPYT    | 10 |
|         | MSK452         | MPXV-9   | 1-8  | 92 | 3-3          | 6  | ARSLDSLRFLEWFHQNYFYFMDV         | 23 | 3-11          | 88                   | 4      | QLRST         | 5  |
| F9      | MSK452         | MPXV-41  | 3-49 | 85 | 4-23         | 4  | SATLTRGELFDY                    | 12 | 3-11          | 96                   | 4      | QQRSNWPLT     | 9  |
| A28     | MSK452         | MPXV-49  | 4-61 | 90 | 3-22         | 5  | VREWPRHYDNRGYHTLPGT             | 19 | 1-5           | 92                   | 1      | QQYNTDSSRT    | 10 |
| A21     | VRC-201-020-08 | VACV-318 | 3-30 | 93 | 5-12         | 3  | QMVKVPPYF                       | 9  | 3-10          | 84                   | 3      | YSTDSTSNQKRV  | 12 |
| H5      | VRC-201-003-09 | VACV-308 | 1-69 | 91 | 5-12         | 4  | ARPQSAYDFGPFDH                  | 14 | 3-21          | 94                   | 1      | HVWHHTTDDHYV  | 11 |
| Unknown | VRC-201-040-05 | VACV-305 | 3-30 | 83 | 6-13         | 5  | VRTQQVIRPFDDH                   | 13 | 3-15          | 98                   | 1      | QQYKNWPPWT    | 10 |
|         |                | VACV-306 | 1-69 | 83 | 3-3          | 6  | ARDCYGVFWSGYFSRCHFGMDV          | 22 | 3-20          | 97                   | 4      | QQYGGSPLLT    | 10 |
|         |                | VACV-307 | 3-23 | 85 | 1-26         | 4  | AKDRGIVGTRFDS                   | 14 | 3-15          | 99                   | 5      | QQYSNWPPIT    | 10 |
|         | VRC-201-020-08 | VACV-311 | 3-73 | 84 | 2-8          | 6  | TRRMDHARRPAREDYNNNGMDI          | 22 | 3-20          | 87                   | 3      | QQYSSSPT      | 8  |
|         |                | VACV-316 | 3-30 | 82 | 2-21         | 4  | AKDLAMMIANPLDC                  | 14 | 3-15          | 98                   | 1      | QQYKNWGT      | 8  |
|         | 18             | VACV-310 | 1-69 | 91 | 6-13         | 4  | ARVFSAAAGH                      | 9  | 1-33          | 94                   | 2      | QQYDNLPSGA    | 10 |
|         | MSK452         | MPXV-8   | 3-30 | 83 | 6-19         | 6  | ARGLIPSAEQWQARGGPDYYYYYG<br>MAV | 27 | ND            | ND                   | ND     | ND            | ND |
|         |                | MPXV-28  | 1-69 | 85 | 6-19         | 4  | ARGGAVTGRGYFDY                  | 16 | 1-39 or 1D-39 | 99                   | 2      | QQSYSTPP      | 8  |
|         |                | MPXV-42  | 1-69 | 83 | 6-13         | 5  | AREKLVGGGWFDP                   | 14 | 3-20          | 94                   | 2      | QQYGHSPYT     | 9  |
|         |                | MPXV-45  | 1-69 | 95 | 3-3          | 4  | ASPQVLRFLQWSPFDY                | 17 | 3-20          | 96                   | 2      | QQYAISPT      | 9  |
|         |                | MPXV-82  | 3-33 | 86 | 5-24         | 4  | ARGVRMTTSLDY                    | 12 | 2-14          | 98                   | 3      | SSYTTISTLGV   | 11 |
|         |                | MPXV-86  | 4-59 | 84 | 3-9          | 5  | ARGVGGVYDILTGYWGNWFDP           | 22 | 1-40          | 97                   | 2 or 3 | QSFDSLLRGSVV  | 12 |
|         |                | MPXV-88  | 3-11 | 83 | 6-13         | 6  | ARNLRAAGVNYFYFYMDV              | 19 | 3-11          | 96                   | 1      | QQRGKWWPPWT   | 10 |
| MPXV-98 | 1-46           | 86       | 3-22 | 5  | VVSSGFQQWFDP | 12 | 3-15                            | 96 | 1             | Identical to MPXV-96 | 9      |               |    |

ND indicates not determined

**Table S3. Reactivity and Cross-Reactivity of Poxvirus-Specific MAb, Related to Figure 1**

| Antigen | Donor          | mAb                   | Reactivity in screen to VACV |        | Cross-reactivity |        |         |            |                   |            |
|---------|----------------|-----------------------|------------------------------|--------|------------------|--------|---------|------------|-------------------|------------|
|         |                |                       | Antigen                      | Lysate | CPXV             |        | MPXV    |            | VARV <sup>a</sup> |            |
|         |                |                       |                              |        | Antigen          | Lysate | Antigen | Lysate     | Antigen           | Lysate     |
| D8      | MVA 1          | VACV-8                | Yes                          | Yes    | ND               | Yes    | ND      | Yes        | no                | Yes (++)   |
|         |                | VACV-56               | Yes                          | Yes    | ND               | no     | ND      | Yes        | no                | Yes (+++)  |
|         |                | VACV-66               | Yes                          | Yes    | ND               | no     | ND      | Yes        | no                | Yes (++++) |
|         |                | VACV-77 <sup>b</sup>  | Yes                          | ND     | ND               | ND     | ND      | ND         | ND                | ND         |
|         |                | VACV-116              | Yes                          | Yes    | ND               | Yes    | ND      | Yes        | no                | ND         |
|         |                | VACV-117              | Yes                          | Yes    | ND               | Yes    | ND      | Yes        | no                | ND         |
|         |                | VACV-128              | Yes                          | Yes    | ND               | Yes    | ND      | no         | no                | Yes (++++) |
|         |                | VACV-136              | Yes                          | Yes    | ND               | Yes    | ND      | Yes        | no                | Yes (++++) |
|         |                | VACV-138              | Yes                          | Yes    | ND               | Yes    | ND      | Yes        | Yes               | Yes (+)    |
|         | MVA 3          | VACV-168              | Yes                          | Yes    | ND               | Yes    | ND      | Yes        | Yes               | no         |
|         | MVA 4          | VACV-159              | Yes                          | Yes    | ND               | Yes    | ND      | Yes        | no                | Yes (+++)  |
|         | MVA 19         | VACV-199              | Yes                          | Yes    | ND               | Yes    | ND      | Yes        | Yes               | no         |
|         | MVA 21         | VACV-228 <sup>b</sup> | Yes                          | ND     | ND               | ND     | ND      | ND         | ND                | ND         |
|         |                | VACV-230              | Yes                          | Yes    | ND               | Yes    | ND      | Yes        | no                | Yes (++)   |
|         |                | VACV-249              | Yes                          | Yes    | ND               | Yes    | ND      | Yes        | Yes               | Yes (+++)  |
|         | VRC-201-040-05 | VACV-304              | Yes                          | Yes    | ND               | Yes    | ND      | Yes        | Yes               | Yes (++)   |
|         | MSK452         | MPXV-27               | Yes                          | Yes    | ND               | Yes    | ND      | Yes        | Yes               | Yes (++)   |
|         |                | MPXV-30               | Yes                          | Yes    | ND               | Yes    | ND      | Yes        | Yes               | Yes (+)    |
|         |                | MPXV-40               | Yes                          | Yes    | ND               | Yes    | ND      | Yes        | Yes               | Yes (++++) |
|         |                | MPXV-61               | Yes                          | Yes    | ND               | Yes    | ND      | Yes        | no                | Yes (++)   |
| MPXV-96 |                | Yes                   | Yes                          | ND     | Yes              | ND     | Yes     | no         | Yes (+)           |            |
| B5      | MVA 1          | VACV-1                | Yes                          | no     | ND               | no     | ND      | no         | Yes               | Yes (+)    |
|         |                | VACV-59               | Yes                          | no     | ND               | Yes    | ND      | no         | Yes               | Yes (+)    |
|         | MVA 4          | VACV-151              | Yes                          | no     | ND               | no     | ND      | no         | Yes               | Yes (++)   |
|         | MVA 12         | VACV-282              | Yes                          | no     | ND               | no     | ND      | no         | Yes               | Yes (++)   |
|         |                | VACV-283              | Yes                          | Yes    | ND               | Yes    | ND      | Yes        | Yes               | Yes (+++)  |
|         | MSK452         | MPXV-2                | Yes                          | Yes    | ND               | Yes    | ND      | Yes        | Yes               | Yes (++)   |
|         |                | MPXV-12               | Yes                          | Yes    | ND               | Yes    | ND      | Yes        | Yes               | no         |
|         |                | MPXV-13               | Yes                          | Yes    | ND               | Yes    | ND      | Yes        | Yes               | Yes (++)   |
|         |                | MPXV-25               | Yes                          | Yes    | ND               | Yes    | ND      | Yes        | Yes               | Yes (++)   |
|         |                | MPXV-38               | Yes                          | Yes    | ND               | Yes    | ND      | Yes        | Yes               | no         |
|         |                | MPXV-43               | Yes                          | Yes    | ND               | Yes    | ND      | no         | Yes               | no         |
|         |                | MPXV-66               | Yes                          | Yes    | ND               | Yes    | ND      | Yes        | Yes               | Yes (++)   |
|         |                | MPXV-70               | Yes                          | Yes    | ND               | Yes    | ND      | Yes        | no                | Yes (+++)  |
| MPXV-92 | Yes            | Yes                   | ND                           | Yes    | ND               | Yes    | Yes     | Yes (++++) |                   |            |
| A33     | MVA 1          | VACV-5                | Yes                          | no     | ND               | no     | ND      | no         | Yes               | ND         |
|         |                | VACV-22               | Yes                          | Yes    | ND               | Yes    | ND      | Yes        | Yes               | no         |
|         |                | VACV-80               | Yes                          | Yes    | ND               | no     | ND      | no         | no                | no         |
|         | MSK452         | MPXV-39               | Yes                          | no     | ND               | no     | ND      | Yes        | no                | no         |
|         |                | MPXV-51               | Yes                          | Yes    | ND               | Yes    | ND      | Yes        | Yes               | no         |

|         |                |          |     |     |    |     |     |     |     |            |
|---------|----------------|----------|-----|-----|----|-----|-----|-----|-----|------------|
| A33     | MSK452         | MPXV-56  | Yes | Yes | ND | Yes | ND  | Yes | Yes | Yes (+)    |
|         |                | MPXV-91  | Yes | no  | ND | Yes | ND  | no  | Yes | Yes (++++) |
|         |                | MPXV-99  | Yes | Yes | ND | Yes | ND  | Yes | Yes | Yes (++)   |
| H3      | VRC-201-020-08 | VACV-314 | Yes | Yes | ND | Yes | ND  | Yes | Yes | Yes (++++) |
|         |                | VACV-315 | Yes | Yes | ND | Yes | ND  | Yes | no  | Yes (+)    |
|         | MSK452         | MPXV-1   | Yes | Yes | ND | Yes | ND  | Yes | no  | Yes (+)    |
|         |                | MPXV-29  | Yes | Yes | ND | Yes | ND  | Yes | Yes | Yes (+)    |
|         |                | MPXV-72  | Yes | Yes | ND | Yes | ND  | Yes | no  | Yes (+)    |
|         |                | MPXV-79  | Yes | Yes | ND | Yes | ND  | Yes | no  | Yes (+)    |
|         |                | MPXV-76  | Yes | Yes | ND | Yes | ND  | Yes | no  | no         |
| MPXV-85 | Yes            | Yes      | ND  | Yes | ND | Yes | no  | no  |     |            |
| L1      | MVA 1          | VACV-33  | Yes | no  | ND | Yes | ND  | no  | Yes | Yes (+)    |
|         |                | VACV-34  | Yes | no  | ND | no  | ND  | no  | Yes | Yes (+)    |
|         | MSK452         | MPXV-26  | Yes | no  | ND | Yes | ND  | no  | Yes | Yes (+)    |
|         |                | MPXV-83  | Yes | no  | ND | Yes | ND  | no  | Yes | ND         |
|         |                | MPXV-74  | Yes | Yes | ND | Yes | ND  | Yes | ND  | Yes (+++)  |
|         |                | MPXV-87  | Yes | Yes | ND | Yes | ND  | Yes | Yes | Yes (++)   |
| A27     | MVA 4          | VACV-154 | Yes | Yes | ND | Yes | Yes | Yes | no  | no         |
|         | VRC-201-040-05 | VACV-300 | Yes | Yes | ND | Yes | Yes | Yes | Yes | Yes (++)   |
|         |                | VACV-301 | Yes | Yes | ND | Yes | Yes | Yes | Yes | no         |
|         |                | VACV-302 | Yes | Yes | ND | Yes | Yes | Yes | no  | Yes (++)   |
|         |                | VACV-303 | Yes | Yes | ND | Yes | Yes | Yes | no  | no         |
| II      | MSK452         | MPXV-10  | Yes | Yes | ND | Yes | ND  | Yes | Yes | no         |
|         |                | MPXV-31  | Yes | Yes | ND | Yes | ND  | Yes | Yes | no         |
|         |                | MPXV-53  | Yes | Yes | ND | Yes | ND  | Yes | no  | no         |
|         |                | MPXV-71  | Yes | Yes | ND | Yes | ND  | Yes | no  | Yes (+++)  |
|         |                | MPXV-97  | Yes | Yes | ND | Yes | ND  | Yes | no  | Yes (+++)  |
| A25     | VRC-201-040-05 | VACV-309 | Yes | Yes | ND | Yes | ND  | Yes | Yes | Yes (+)    |
|         | VRC-201-044-06 | VACV-312 | Yes | Yes | ND | Yes | ND  | no  | Yes | Yes (+)    |
|         | VRC-201-020-08 | VACV-313 | Yes | Yes | ND | Yes | ND  | no  | Yes | Yes (+)    |
|         | MSK452         | MPXV-9   | Yes | Yes | ND | Yes | ND  | Yes | Yes | no         |
| F9      | MSK452         | MPXV-41  | Yes | no  | ND | no  | ND  | no  | ND  | no         |
| A28     | MSK452         | MPXV-49  | Yes | no  | ND | no  | ND  | no  | ND  | Yes (+)    |
| A21     | VRC-201-020-08 | VACV-318 | Yes | no  | ND | no  | ND  | no  | no  | no         |
| H5      | VRC-201-003-09 | VACV-308 | Yes | Yes | ND | Yes | ND  | Yes | Yes | no         |

ND indicates not determined

**Yes:** mAb reactivity was confirmed by ELISA or protein microarray or biolayer Interferometry

**No:** mAb was tested and found as not reactive

<sup>a</sup>Range of mAb binding efficiency to VARV-infected cell lysate, where numbers indicate optical density from ELISA: + (0 - 0.099 OD); ++ (0.1 - 0.299 OD);

+++ (0.3 - 0.499 OD); ++++ (0.5 - 0.799 OD); +++++ (> 0.8 OD)

<sup>b</sup>MAbs with low expression that were excluded from the analysis

**Table S4. Binding of Poxvirus-Specific MAbs to Purified Antigens or Infected Cell Lysates, Related to Figure 1**

| Antigen | Donor          | mAb      | EC <sub>50</sub> (µg/mL) |      |      |       |                            |        |        |      |
|---------|----------------|----------|--------------------------|------|------|-------|----------------------------|--------|--------|------|
|         |                |          | Purified antigen         |      |      |       | Virus-infected cell lysate |        |        |      |
|         |                |          | VACV                     | CPXV | MPXV | VARV  | VACV                       | CPXV   | MPXV   | VARV |
| D8      | MVA 1          | VACV-8   | ND                       | ND   | ND   | ND    | 0.04                       | 0.1    | 0.06   | ND   |
|         |                | VACV-56  | ND                       | ND   | ND   | ND    | 0.01                       | >      | 0.008  | ND   |
|         |                | VACV-66  | ND                       | ND   | ND   | ND    | 0.01                       | >      | >0.3   | ND   |
|         |                | VACV-77  | ND                       | ND   | ND   | ND    | ND                         | ND     | ND     | ND   |
|         |                | VACV-116 | 1.8                      | ND   | ND   | ND    | 0.01                       | 0.01   | >26    | ND   |
|         |                | VACV-117 | 1.8                      | ND   | ND   | ND    | 0.01                       | 0.01   | >26    | ND   |
|         |                | VACV-128 | 1.1                      | ND   | ND   | ND    | 0.3                        | 0.25   | >      | ND   |
|         |                | VACV-136 | ND                       | ND   | ND   | ND    | 0.06                       | 0.05   | 0.04   | ND   |
|         | VACV-138       | 0.5      | ND                       | ND   | ND   | 0.08  | 0.04                       | 0.1    | ND     |      |
|         | MVA 3          | VACV-168 | ND                       | ND   | ND   | ND    | 0.4                        | 0.8    | 0.5    | ND   |
|         | MVA 4          | VACV-159 | ND                       | ND   | ND   | ND    | 0.009                      | >28    | >14    | ND   |
|         | MVA 19         | VACV-199 | ND                       | ND   | ND   | ND    | 0.008                      | 0.008  | >19    | ND   |
|         | MVA 21         | VACV-228 | ND                       | ND   | ND   | ND    | ND                         | ND     | ND     | ND   |
|         |                | VACV-230 | ND                       | ND   | ND   | ND    | 0.6                        | 3.3    | 1      | ND   |
|         |                | VACV-249 | 2.8                      | ND   | ND   | ND    | 0.3                        | 0.4    | 0.1    | ND   |
|         | VRC-201-040-05 | VACV-304 | 0.05                     | ND   | ND   | ND    | 0.04                       | 0.05   | 0.1    | ND   |
|         | MSK452         | MPXV-27  | 0.09                     | ND   | ND   | ND    | 0.02                       | 0.02   | 0.02   | ND   |
|         |                | MPXV-30  | ND                       | ND   | ND   | ND    | 0.004                      | 0.004  | 0.003  | ND   |
|         |                | MPXV-40  | 0.09                     | ND   | ND   | ND    | 0.01                       | 0.02   | 0.01   | ND   |
|         |                | MPXV-61  | ND                       | ND   | ND   | ND    | 0.007                      | 0.009  | 0.004  | ND   |
| MPXV-96 |                | ND       | ND                       | ND   | ND   | 0.001 | 0.003                      | 0.001  | ND     |      |
| B5      | MVA 1          | VACV-1   | 0.02                     | ND   | ND   | 0.02  | >                          | >      | >      | ND   |
|         |                | VACV-59  | 0.14                     | ND   | ND   | 0.18  | >                          | 0.78   | >      | ND   |
|         | MVA 4          | VACV-151 | 0.04                     | ND   | ND   | 0.04  | >                          | >      | >      | ND   |
|         |                | VACV-282 | 0.155                    | ND   | ND   | 3.15  | >                          | >      | >      | ND   |
|         | MVA 12         | VACV-283 | 0.06                     | ND   | ND   | 0.08  | >48                        | >41    | >50    | ND   |
|         |                | MPXV-2   | 0.03                     | ND   | ND   | 0.06  | >6                         | >13    | >6     | ND   |
|         | MSK452         | MPXV-12  | 0.1                      | ND   | ND   | 0.1   | 5.85                       | 12.62  | 5.62   | ND   |
|         |                | MPXV-13  | >10                      | ND   | ND   | 0.03  | >0.1                       | 0.004  | >0.1   | ND   |
|         |                | MPXV-25  | 0.19                     | ND   | ND   | 0.19  | 0.066                      | 0.05   | >0.24  | ND   |
|         |                | MPXV-38  | 0.08                     | ND   | ND   | 0.08  | >50                        | >50    | >50    | ND   |
|         |                | MPXV-43  | 10.1                     | ND   | ND   | 10.8  | 0.011                      | >62.8  | >      | ND   |
|         |                | MPXV-66  | 0.1                      | ND   | ND   | 0.16  | >33                        | >29    | >16    | ND   |
|         |                | MPXV-70  | 0.1                      | ND   | ND   | >     | >9                         | >24    | >13    | ND   |
| MPXV-92 |                | 0.7      | ND                       | ND   | 1.2  | 0.064 | 0.014                      | 0.046  | ND     |      |
| A33     | MVA 1          | VACV-5   | 0.03                     | ND   | ND   | 0.01  | >                          | >      | >      | ND   |
|         |                | VACV-22  | 0.03                     | ND   | ND   | 0.02  | >0.008                     | >0.009 | >0.006 | ND   |
|         |                | VACV-80  | 0.065                    | ND   | ND   | >     | > 69                       | >      | >      | ND   |
|         | MSK452         | MPXV-39  | 0.07                     | ND   | ND   | >     | >                          | >      | >47    | ND   |
|         |                | MPXV-51  | 0.04                     | ND   | ND   | 0.04  | 0.05                       | 0.024  | 0.025  | ND   |
|         |                | MPXV-56  | 0.06                     | ND   | ND   | 0.05  | >0.07                      | >0.07  | >26    | ND   |
|         |                | MPXV-91  | 0.03                     | ND   | ND   | 0.03  | >                          | 0.26   | >      | ND   |
|         |                | MPXV-99  | 0.01                     | ND   | ND   | 0.04  | >49                        | >18    | >0.008 | ND   |
| H3      | VRC-201-020-08 | VACV-314 | 0.1                      | ND   | ND   | ND    | 0.003                      | 0.004  | 0.003  | ND   |
|         | VRC-201-020-08 | VACV-315 | 0.2                      | ND   | ND   | ND    | 0.002                      | 0.002  | 0.001  | ND   |

|         |                |          |       |    |       |       |        |        |        |    |
|---------|----------------|----------|-------|----|-------|-------|--------|--------|--------|----|
| H3      | MSK452         | MPXV-1   | 0.4   | ND | ND    | ND    | 0.009  | 0.011  | 0.005  | ND |
|         |                | MPXV-29  | ND    | ND | ND    | ND    | 0.001  | 0.002  | 0.001  | ND |
|         |                | MPXV-72  | 0.04  | ND | ND    | ND    | 0.005  | 0.003  | 0.003  | ND |
|         |                | MPXV-79  | 0.06  | ND | ND    | ND    | 0.004  | 0.004  | 0.003  | ND |
|         |                | MPXV-76  | ND    | ND | ND    | ND    | 0.008  | 0.01   | 0.006  | ND |
|         |                | MPXV-85  | 0.04  | ND | ND    | ND    | 0.003  | 0.002  | 0.002  | ND |
| L1      | MVA 1          | VACV-33  | 0.02  | ND | ND    | 0.02  | >      | 0.06   | >      | ND |
|         |                | VACV-34  | 0.04  | ND | ND    | 0.02  | >      | >      | >      | ND |
|         | MSK452         | MPXV-26  | 0.05  | ND | ND    | 0.02  | >      | 0.05   | >      | ND |
|         |                | MPXV-83  | 0.065 | ND | ND    | 0.065 | >      | 0.03   | >      | ND |
|         |                | MPXV-74  | ND    | ND | ND    | ND    | 0.02   | 0.02   | 0.02   | ND |
|         |                | MPXV-87  | 0.3   | ND | ND    | 0.3   | 0.01   | 0.003  | 0.001  | ND |
| A27     | MVA 4          | VACV-154 | 0.06  | ND | 0.06  | 0.3   | >0.1   | 0.02   | 0.02   | ND |
|         | VRC-201-040-05 | VACV-300 | 0.22  | ND | 0.14  | 0.79  | >0.37  | 0.06   | >0.68  | ND |
|         |                | VACV-301 | 0.03  | ND | 0.04  | 0.11  | >21    | >1.4   | >5.6   | ND |
|         |                | VACV-302 | 0.08  | ND | 0.04  | 0.55  | 0.01   | 0.01   | 0.01   | ND |
|         |                | VACV-303 | 0.02  | ND | 0.02  | 0.16  | 0.05   | 0.004  | 0.004  | ND |
| I1      | MSK452         | MPXV-10  | ND    | ND | ND    | ND    | 0.003  | 0.006  | >0.02  | ND |
|         |                | MPXV-31  | ND    | ND | ND    | ND    | 0.01   | 0.01   | 0.04   | ND |
|         |                | MPXV-53  | ND    | ND | ND    | ND    | 0.008  | 0.011  | >0.08  | ND |
|         |                | MPXV-71  | ND    | ND | ND    | ND    | 0.022  | 0.014  | 0.006  | ND |
|         |                | MPXV-97  | ND    | ND | ND    | ND    | 0.008  | >50    | 0.001  | ND |
| A25     | VRC-201-040-05 | VACV-309 | ND    | ND | ND    | ND    | 0.005  | 0.005  | 0.001  | ND |
|         | VRC-201-044-06 | VACV-312 | ND    | ND | ND    | ND    | 0.002  | >50    | >      | ND |
|         | VRC-201-020-08 | VACV-313 | ND    | ND | ND    | ND    | 0.001  | 1.172  | >      | ND |
|         | MSK452         | MPXV-9   | ND    | ND | ND    | ND    | 0.022  | 0.876  | 0.107  | ND |
| F9      | MSK452         | MPXV-41  | 0.008 | ND | ND    | ND    | >      | >      | >      | ND |
| A28     | MSK452         | MPXV-49  | 0.02  | ND | ND    | ND    | >      | >      | >      | ND |
| A21     | VRC-201-020-08 | VACV-318 | 1.3   | ND | ND    | ND    | >      | >      | >      | ND |
| H5      | VRC-201-003-09 | VACV-308 | ND    | ND | ND    | ND    | 0.006  | 0.002  | 0.003  | ND |
| Unknown | VRC-201-040-05 | VACV-305 | ND    | ND | ND    | ND    | 0.003  | 0.001  | 0.002  | ND |
|         |                | VACV-306 | ND    | ND | ND    | ND    | 0.003  | 0.001  | 0.001  | ND |
|         |                | VACV-307 | ND    | ND | ND    | ND    | 0.004  | 0.003  | 0.002  | ND |
|         | VRC-201-020-08 | VACV-311 | ND    | ND | ND    | ND    | 0.517  | >      | >      | ND |
|         |                | VACV-316 | ND    | ND | ND    | ND    | 3.521  | >      | >      | ND |
|         | 18             | VACV-310 | ND    | ND | ND    | ND    | 0.027  | 0.004  | >      | ND |
|         | MSK452         | MPXV-8   | ND    | ND | ND    | ND    | 0.118  | 0.058  | 0.039  | ND |
|         |                | MPXV-28  | ND    | ND | ND    | ND    | 0.001  | >16    | 0.001  | ND |
|         |                | MPXV-42  | ND    | ND | ND    | ND    | 0.017  | 0.036  | 0.018  | ND |
|         |                | MPXV-45  | ND    | ND | ND    | ND    | 0.0002 | 0.0004 | 0.0001 | ND |
|         |                | MPXV-82  | ND    | ND | ND    | ND    | 0.003  | 0.004  | 0.002  | ND |
|         |                | MPXV-86  | ND    | ND | ND    | ND    | ND     | ND     | ND     | ND |
|         |                | MPXV-88  | ND    | ND | ND    | ND    | >62    | 0.03   | 0.05   | ND |
| MPXV-98 | ND             | ND       | ND    | ND | 0.014 | 0.006 | 0.004  | ND     |        |    |

EC<sub>50</sub> values (µg/mL) indicated in colors:

|        |             |           |          |        |          |      |
|--------|-------------|-----------|----------|--------|----------|------|
| <0.001 | 0.0011-0.01 | 0.011-0.1 | 0.11-1.0 | 1.1-10 | 10.1-100 | >100 |
|--------|-------------|-----------|----------|--------|----------|------|

> indicates that binding was not detected even when mAb was tested at the highest concentration of 100 µg/mL  
 ND indicates not determined





|          |                |           |             |              |              |             |             |              |              |              |             |              |              |             |    |   |
|----------|----------------|-----------|-------------|--------------|--------------|-------------|-------------|--------------|--------------|--------------|-------------|--------------|--------------|-------------|----|---|
| H3       | VRC-201-020-08 | VACV-314  | IgG3        | <            | 0.1<br>(74)  | ND          | ND          | <            | 0.7<br>(85)  | ND           | ND          | <            | 0.8<br>(84)  | ND          | ND |   |
|          |                | VACV-315  | IgG1        | <            | 2.2<br>(72)  | ND          | ND          | <            | 2.8<br>(70)  | ND           | ND          | <            | <            | ND          | ND |   |
|          | MSK452         | MPXV-1    | IgG1        | <            | <            | ND          | ND          | <            | 2.4<br>(53)  | ND           | ND          | 25<br>(77)   | 3<br>(85)    | ND          | ND |   |
|          |                | MPXV-29   | IgG1        | <            | <            | <           | <           | <            | <            | ND           | ND          | <            | <            | <           | <  |   |
|          |                | MPXV-72   | IgG1        | <            | 11.4<br>(66) | ND          | ND          | <            | 1.7<br>(84)  | ND           | ND          | <            | 6.2<br>(64)  | ND          | ND |   |
|          |                | MPXV-76   | IgG1        | <            | <            | <           | <           | <            | <            | ND           | ND          | <            | <            | <           | <  |   |
|          |                | MPXV-79   | IgG1        | <            | 4.7<br>(62)  | ND          | ND          | <            | 0.2<br>(81)  | ND           | ND          | 12.5<br>(67) | <            | ND          | ND |   |
| MPXV-85  | IgG1           | <         | 3.4<br>(63) | ND           | ND           | <           | 0.6<br>(82) | ND           | ND           | 12.5<br>(77) | 100<br>(51) | ND           | ND           |             |    |   |
| L1       | MVA 1          | VACV-33   | IgG1        | 0.3<br>(56)  | 0.7<br>(71)  | ND          | ND          | 0.5<br>(74)  | 0.2<br>(75)  | ND           | ND          | 70<br>(50)   | <            | ND          | ND |   |
|          |                | VACV-34   | IgG1        | 3.3<br>(76)  | 0.96<br>(78) | ND          | ND          | 2.7<br>(88)  | 7<br>(88)    | ND           | ND          | 63<br>(64)   | <            | ND          | ND |   |
|          | MSK452         | MPXV-26   | IgG1        | 0.3<br>(95)  | 0.7<br>(80)  | ND          | ND          | 0.07<br>(99) | 0.2<br>(93)  | ND           | ND          | 3<br>(96)    | 6.2<br>(97)  | ND          | ND |   |
|          |                | MPXV-83   | IgG1        | 0.3<br>(56)  | 0.2<br>(75)  | ND          | ND          | 0.2<br>(69)  | 0.1<br>(78)  | ND           | ND          | <            | 12.5<br>(67) | ND          | ND |   |
|          |                | MPXV-74   | IgG1        | <            | 0.09<br>(79) | ND          | ND          | <            | 0.08<br>(71) | ND           | ND          | <            | <            | ND          | ND |   |
| MPXV-87  | IgG1           | 5<br>(61) | 0.8<br>(72) | ND           | ND           | 0.8<br>(63) | 0.6<br>(82) | ND           | ND           | 50<br>(57)   | 50<br>(65)  | ND           | ND           |             |    |   |
| A27      | MVA 4          | VACV-154  | IgG1        | <            | <            | ND          | ND          | <            | <            | ND           | ND          | 15<br>(66)   | 14<br>(69)   | ND          | ND |   |
|          | VRC-201-040-05 | VACV-300  | IgG1        | <            | <            | ND          | ND          | <            | <            | ND           | ND          | <            | <            | ND          | ND |   |
|          |                | VACV-301  | IgG3        | 0.5<br>(61)  | 0.1<br>(77)  | ND          | ND          | <            | 4<br>(86)    | ND           | ND          | 1.6<br>(84)  | 0.8<br>(92)  | ND          | ND |   |
|          |                | VACV-302  | IgG1        | 12.3<br>(81) | 0.1<br>(53)  | ND          | ND          | 11<br>(93)   | 0.2<br>(81)  | ND           | ND          | 0.1<br>(88)  | 6.3<br>(82)  | ND          | ND |   |
| VACV-303 | IgG1           | <         | <           | ND           | ND           | <           | <           | ND           | ND           | 25<br>(51)   | 15<br>(64)  | ND           | ND           |             |    |   |
| I1       | MSK452         | MPXV-10   | IgG1        | <            | <            | <           | <           | ND           | ND           | ND           | ND          | <            | <            | <           | <  |   |
|          |                | MPXV-31   | IgG1        | <            | <            | <           | <           | ND           | ND           | ND           | ND          | <            | <            | <           | <  |   |
|          |                | MPXV-53   | IgG1        | <            | <            | <           | <           | ND           | ND           | ND           | ND          | <            | <            | <           | <  |   |
|          |                | MPXV-71   | IgG1        | <            | <            | <           | <           | ND           | ND           | ND           | ND          | <            | <            | <           | <  |   |
|          |                | MPXV-97   | IgG1        | <            | <            | <           | <           | <            | <            | ND           | ND          | 0.02<br>(96) | 0.02<br>(76) | <           | <  |   |
| A25      | VRC-201-040-05 | VACV-309  | IgG1        | <            | <            | <           | <           | ND           | ND           | ND           | ND          | <            | <            | <           | <  |   |
|          | VRC-201-044-06 | VACV-312  | IgG1        | <            | <            | <           | <           | ND           | ND           | ND           | ND          | ND           | ND           | <           | <  |   |
|          | VRC-201-020-08 | VACV-313  | IgG1        | <            | <            | <           | <           | ND           | ND           | ND           | ND          | <            | <            | <           | <  |   |
|          | MSK452         | MPXV-9    | IgG1        | <            | <            | <           | <           | ND           | ND           | ND           | ND          | <            | <            | <           | <  |   |
| F9       | MSK452         | MPXV-41   | IgG1        | <            | <            | <           | <           | ND           | ND           | ND           | ND          | <            | <            | <           | <  |   |
| A28      | MSK452         | MPXV-49   | IgG1        | <            | <            | <           | <           | ND           | ND           | ND           | ND          | <            | <            | <           | <  |   |
| A21      | VRC-201-020-08 | VACV-318  | IgG1        | <            | <            | <           | <           | ND           | ND           | ND           | ND          | <            | <            | <           | <  |   |
| H5       | VRC-201-003-09 | VACV-308  | IgG1        | <            | <            | <           | <           | ND           | ND           | ND           | ND          | <            | <            | <           | <  |   |
| Unknown  | VRC-201-040-05 | VACV-305  | IgG1        | <            | <            | <           | <           | ND           | ND           | ND           | ND          | <            | <            | <           | <  |   |
|          |                | VACV-306  | IgG1        | <            | <            | <           | <           | ND           | ND           | ND           | ND          | <            | <            | <           | <  |   |
|          |                | VACV-307  | IgG1        | <            | <            | <           | <           | ND           | ND           | ND           | ND          | <            | <            | <           | <  |   |
|          | VRC-201-020-08 | VACV-311  | IgG1        | <            | <            | <           | <           | <            | <            | ND           | ND          | ND           | <            | <           | <  | < |
|          |                | VACV-316  | IgG1        | <            | <            | <           | <           | ND           | ND           | ND           | ND          | <            | <            | <           | <  |   |
|          | 18             | VACV-310  | IgG1        | <            | <            | <           | <           | ND           | ND           | ND           | ND          | <            | <            | <           | <  |   |
|          | MSK452         | MPXV-8    | IgG1        | <            | <            | <           | <           | ND           | ND           | ND           | ND          | <            | <            | <           | <  |   |
|          |                | MPXV-28   | IgG1        | <            | <            | <           | <           | ND           | ND           | ND           | ND          | <            | <            | <           | <  |   |
|          |                | MPXV-42   | IgG1        | <            | <            | <           | <           | ND           | ND           | ND           | ND          | <            | <            | <           | <  |   |
|          |                | MPXV-45   | IgG1        | <            | <            | <           | <           | ND           | ND           | ND           | ND          | <            | <            | <           | <  |   |
| MPXV-82  |                | IgG1      | <           | <            | <            | <           | ND          | ND           | ND           | ND           | <           | <            | <            | <           |    |   |
| MPXV-86  |                | ND        | <           | <            | <            | <           | ND          | ND           | ND           | ND           | <           | <            | <            | <           |    |   |
| MPXV-88  |                | ND        | <           | <            | <            | <           | ND          | ND           | ND           | ND           | <           | <            | <            | 3.1<br>(78) |    |   |
| MPXV-98  | IgG1           | <         | <           | <            | <            | ND          | ND          | ND           | ND           | <            | <           | <            | <            |             |    |   |

Range of IC<sub>50</sub> values (µg/mL) indicated by the heat map as below:

|          |          |        |          |      |
|----------|----------|--------|----------|------|
| 0.01-0.1 | 0.11-1.0 | 1.1-10 | 10.1-100 | >100 |
|----------|----------|--------|----------|------|

< indicates that the E<sub>max</sub> was below 50% even at the highest concentration of 100 µg/mL

ND indicates not determined

C' indicates neutralization assay was performed in the presence of complement

**Table S6. Composition of MAb Mixtures, Related to Figure 3 and Figure 5**

| Mixture              | Human mAb specificity |         |         |         |          |         | Ratio       | Total amount of mAbs per mouse, mg | MAb clones included                                     |
|----------------------|-----------------------|---------|---------|---------|----------|---------|-------------|------------------------------------|---------------------------------------------------------|
|                      | Anti-A27              | Anti-D8 | Anti-H3 | Anti-L1 | Anti-A33 | Anti-B5 |             |                                    |                                                         |
| Mix6                 | 1                     | 1       | 1       | 1       | 1        | 1       | 1:1:1:1:1:1 | 1.2                                | VACV-301, VACV-249, MPXV-72, MPXV-26, VACV-22, VACV-283 |
| Mix6 ( $\Delta$ D8)  | 1                     | -       | 1       | 1       | 1        | 1       | 1:1:1:1:1   | 1                                  | VACV-301, MPXV-72, MPXV-26, VACV-22, VACV-283           |
| Mix6 ( $\Delta$ L1)  | 1                     | 1       | 1       | -       | 1        | 1       | 1:1:1:1:1   | 1                                  | VACV-301, VACV-249, MPXV-72, VACV-22, VACV-283          |
| Mix6 ( $\Delta$ A27) | -                     | 1       | 1       | 1       | 1        | 1       | 1:1:1:1:1   | 1                                  | VACV-249, MPXV-72, MPXV-26, VACV-22, VACV-283           |
| Mix6 ( $\Delta$ H3)  | 1                     | 1       | -       | 1       | 1        | 1       | 1:1:1:1:1   | 1                                  | VACV-301, VACV-249, MPXV-26, VACV-22, VACV-283          |
| Mix6 ( $\Delta$ A33) | 1                     | 1       | 1       | 1       | -        | 1       | 1:1:1:1:1   | 1                                  | VACV-301, VACV-249, MPXV-72, MPXV-26, VACV-283          |
| Mix6 ( $\Delta$ B5)  | 1                     | 1       | 1       | 1       | 1        | -       | 1:1:1:1:1   | 1                                  | VACV-301, VACV-249, MPXV-72, MPXV-26, VACV-22           |
| Anti-D8/mix          | -                     | 5       | -       | -       | -        | -       | 1:1:1:1:1   | 1                                  | VACV-249, VACV-8, VACV-304, VACV-66, MPXV-40            |
| Anti-H3/mix          | -                     | -       | 3       | -       | -        | -       | 1:1:1       | 0.6                                | VACV-314, VACV-315, MPXV-72                             |
| Mix4                 | 1                     | -       | -       | 1       | 1        | 1       | 1:1:1:1     | 0.8                                | VACV-301, MPXV-26, VACV-22, VACV-283                    |
| Mix4 ( $\Delta$ L1)  | 1                     | -       | -       | -       | 1        | 1       | 2:1:1       | 0.8                                | VACV-301, VACV-22, VACV-283                             |
| Mix4 ( $\Delta$ B5)  | 1                     | -       | -       | 1       | 1        | -       | 1:1:2       | 0.8                                | VACV-301, MPXV-26, VACV-22                              |
| Mix6 ( $\Delta$ EV)  | 1                     | 1       | 1       | 1       | -        | -       | 1:1:1:1:1   | 0.8                                | VACV-301, VACV-249, MPXV-72, MPXV-26                    |
| Mix6 ( $\Delta$ MV)  | -                     | -       | -       | -       | 1        | 1       | 1:1         | 0.4                                | VACV-22, VACV-283                                       |

An entry using the “-“ symbol above indicates that the mAb listed in the column header was not included in the mix listed to the left.
